# Supplementary material for: A whole-genome assembly of the domestic cow, Bos taurus
Source: Springer Nature journal article supplement (doi:10.1186/gb-2009-10-4-r42), 2009-04-24

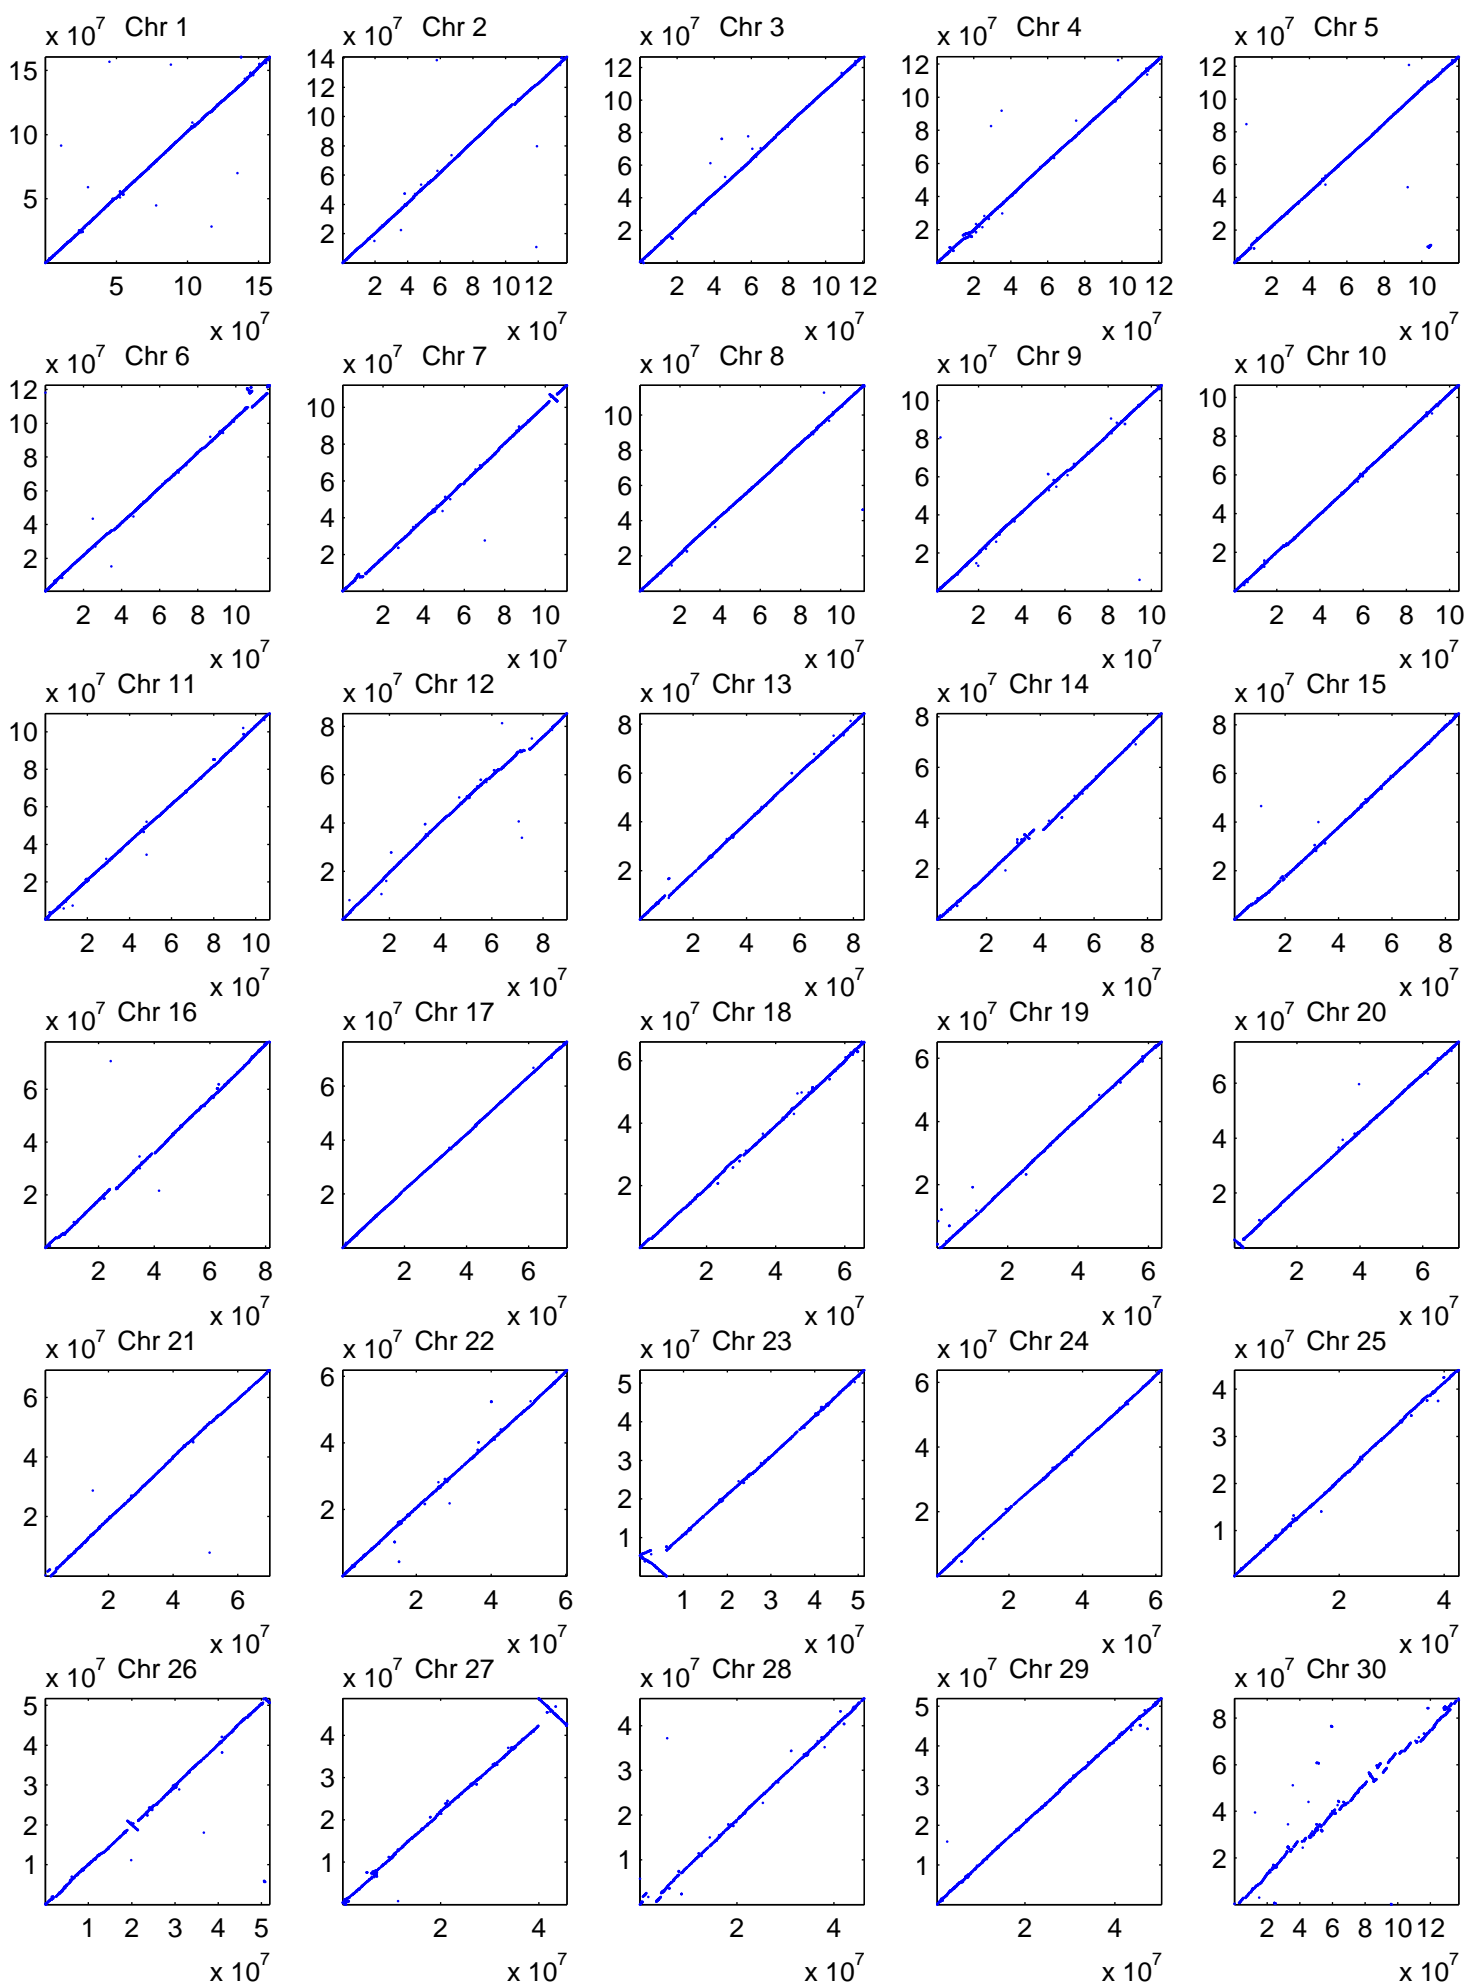

Supplement: 13059_2009_2192_MOESM2_ESM.pdf [file 13059_2009_2192_MOESM2_ESM.pdf]
